# Supplementary material for: Protein structural disorder of the envelope V3 loop contributes to the switch in human immunodeficiency virus type 1 cell tropism
Source: PubMed Central journal article supplement (PMC5648111; doi:10.1371/journal.pone.0185790), 2017-10-19

## Supplementary figure

Fig S1. Boxplot and nonparametric comparisons of the V3 loop disorder tendency between R5 and X4 viruses from all patients (1, 2, 3, 5, 6, 7, 8, 9 and 11) in Shankarappa et al. data (1). (\* $p < 0.05$ , \*\* $p < 0.01$ , \*\*\* $p < 0.001$ , asterisks colored with blue and red represent results for R5 and X4 virus, respectively; X means  $p > 0.05$ ).

1. **Shankarappa R, Margolick JB, Gange SJ, Rodrigo AG, Upchurch D, Farzadegan H, Gupta P, Rinaldo CR, Learn GH, He X, Huang XL, Mullins JI.** 1999. Consistent viral evolutionary changes associated with the progression of human immunodeficiency virus type 1 infection. *Journal of virology* **73**:10489-10502.

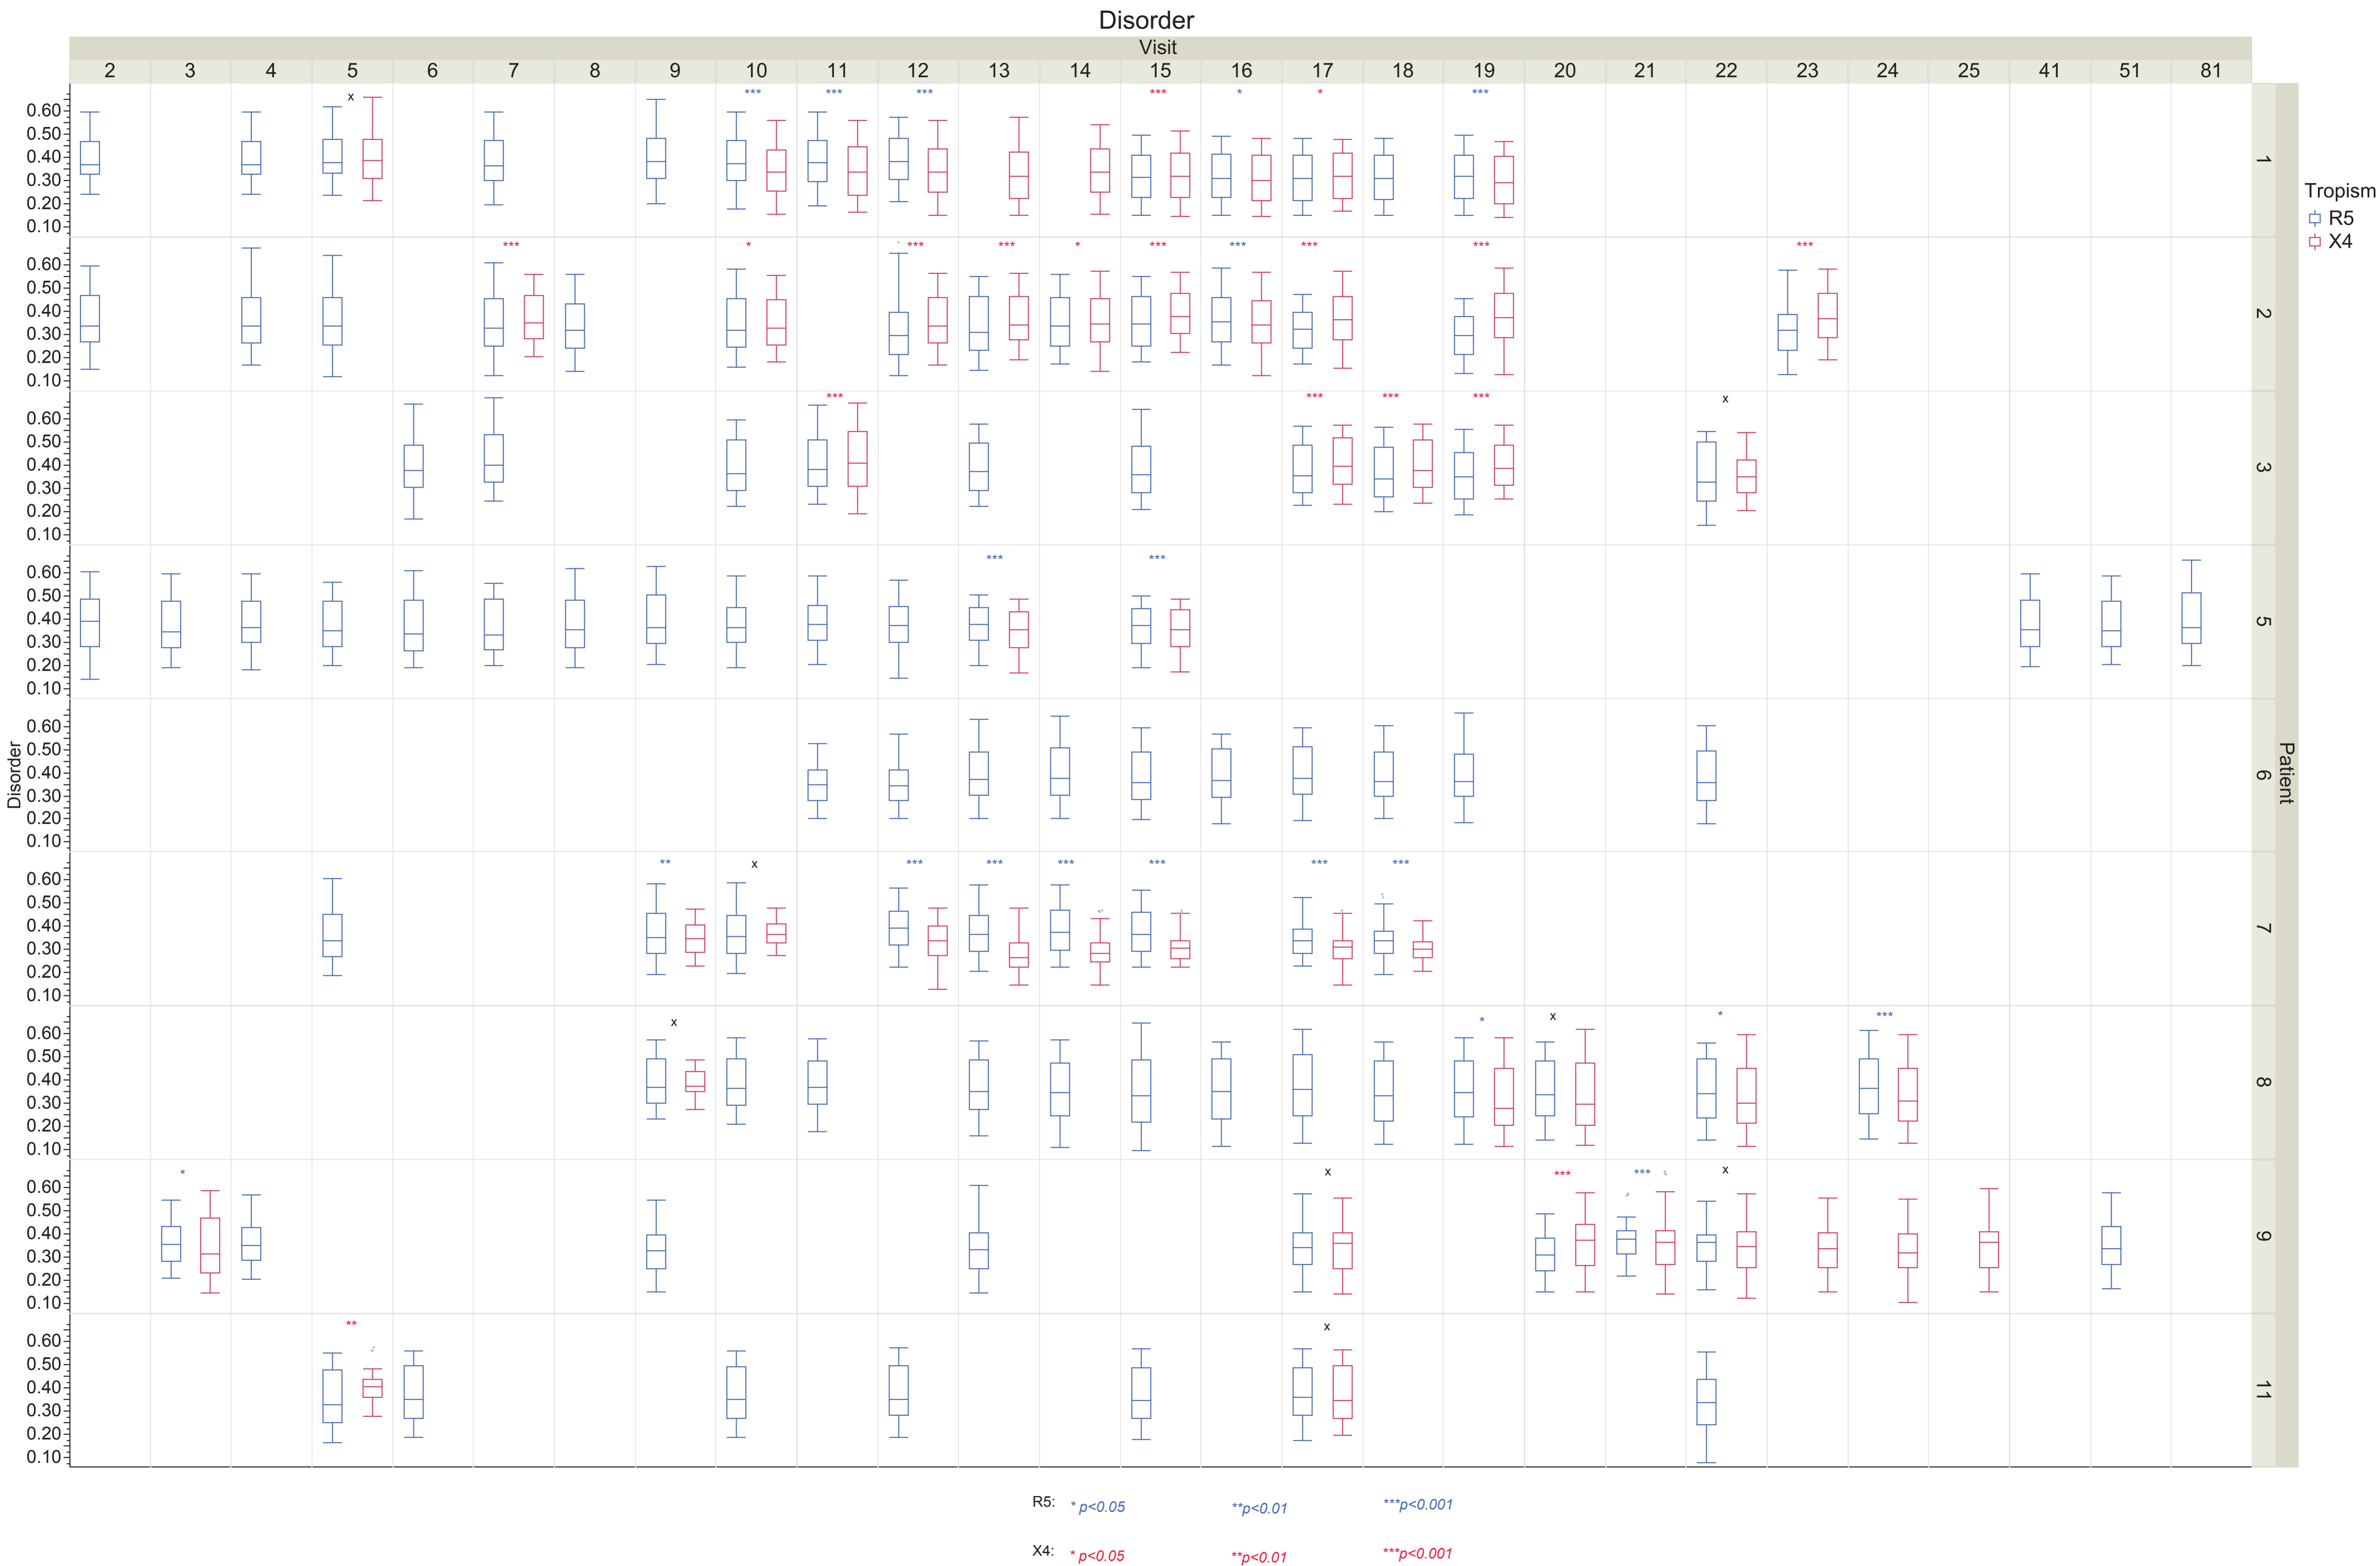

Supplement: pone.0185790.s003.pdf [file pone.0185790.s003.pdf]
